# Supplementary material for: A tin porphyrin axially-coordinated two-dimensional covalent organic polymer for efficient hydrogen evolution
Source: Royal Society of Chemistry journal article supplement (doi:10.1039/d2cc02775e), 2022-01-01
Supplement: d2cc02775e1.pdf [file d2cc02775e1.pdf]

## Supporting information

### **Tin porphyrin axially-coordinated two-dimensional covalent organic polymer for efficient hydrogen evolution**

Qi Wang, Aijian Wang\*, Yuqin Dou, Xiaoliang Shen, M. Shire Sudi, Long Zhao\*,  
Weihua Zhu, Longhua Li\*

School of Chemistry & Chemical Engineering, Jiangsu University, Zhenjiang  
212013, P.R. China

Corresponding Author. Tel: +86-511-88791928. E-mail: [wajujs@ujs.edu.cn](mailto:wajujs@ujs.edu.cn),  
[longzhao@ujs.edu.cn](mailto:longzhao@ujs.edu.cn), [longhuali@ujs.edu.cn](mailto:longhuali@ujs.edu.cn)

#### **Experimental section**

##### **Reagents and materials**

Tin(II) chloride ( $\text{SnCl}_2$ ), Ni foam (NF), Nafion (5 wt%) and NaOH are obtained from Sinopharm Chemical Reagent Co., Ltd. All reagents and solvents are of chemical or analytical grade and were used without further purification. The deionized water was used throughout all the experiments including electrocatalytic processes. 5,10,15,20-Tetrakis(4-hydroxy-phenyl) porphyrin (TPP) and dichloro(5,10,15,20-tetraphenylporphyrinato)tin(IV) ( $\text{SnTPP}$ ) were prepared based on previously reported methods with slight modifications.<sup>1</sup>

##### **Material Characterizations**

The morphologies, composition and structure of all samples were studied by the scanning electron microscopy (SEM, a Model S4800, Hitachi), X-ray photoelectron spectroscopy (XPS, a RBD upgraded PHI-5000C ESCA), Fourier-transform infrared (FTIR) spectra (a MB154S-FTIR spectrometer, Bomem, Canada), UV-Vis spectra recorded using a Varian Cary 500 spectrophotometer, and solid  $^{13}\text{C}$  NMR spectra (a Bruker AVIII 400 MHz instrument using a BBFO probe). Density functional theory (DFT) calculations were performed with the Gaussian 09 program.

##### **Electrochemical measurements**

All electrochemical measurements including HER LSV curves were recorded on

a CHI 614E electrochemical workstation (CH Instrument, China) in 1.0 M KOH solution. The sample covered NF is used as the working electrode, a Pt gauze ( $1 \times 1 \text{ cm}^2$ ) as the counter electrode and a mercury/ mercury oxide electrode (MOE) as the reference electrode. The long-term stability of SnTPPCOP was also studied by using the same electrolyzer. To prepare the working electrode, the catalysts (2 mg) and Nafion solution (5 wt%, 40  $\mu\text{L}$ ) were dispersed in  $\text{CH}_3\text{CH}_2\text{OH}$  (0.5 mL), then the solution was sonicated for 1.0 h to give the homogeneous ink. Subsequently, the well-mixed suspension (80  $\mu\text{L}$ ) was loaded onto the NF paper. The obtained electrode was then dried naturally at room temperature and retained for use. The measured potential in this work has been calibrated with the reversible hydrogen electrode potential (RHE) based on Nernst equations. The electrochemical impedance spectroscopy (EIS) measurement was recorded in the frequencies ranging from 0.01 Hz to 100 KHz with an amplitude of 1 mV. The double-layer capacitance of the as-synthesized samples is determined by the cyclic voltammograms with different scan rates (20, 40, 60, 80, and 100 mV/s) in the scope of 0-0.4 V vs. RHE.

The production of  $\text{H}_2$  during a potentiostatic electrolysis experiment was determined by the water displacement method. If the initial height of water in the gas gathering tube before the gas gathering experiment is  $h_0$ , and after the potentiostatic electrolysis experiment the generated gas is gathered into the tube and the final height of water in the gas gathering tube become  $h_1$ , then the volume of generated gas ( $V$ ) should be  $s(h_0-h_1)$ , where  $s$  is the inner cross-sectional area of the gas gathering tube. At the initial status, the pressure inside the gas gathering tube ( $P_0$ ) is  $P - \rho gh_0$ , where  $P$  is the atmospheric pressure,  $\rho$  is the density of water, and  $g$  is the acceleration due to gravity. The output voltage of the differential pressure transducer would be  $U_0 = k(P - P_0) = k\rho gh_0$ , where  $k$  is the sensitivity of the differential pressure transducer (1 mV/Pa for a Freescale MPXV7002DP). When the height of water in the gas gathering tube decreases to  $h_1$ , the pressure inside the gas gathering tube becomes  $P_1$ , and  $P_1 = P - \rho gh_1$ . Then, the output of the differential pressure transducer is  $U_1 = k(P - P_1) = k\rho gh_1$ . Accordingly, the volume of generated gas can be computed by  $V = s(h_0 - h_1) = s(U_0/k\rho g - U_1/k\rho g) = s(U_0 - U_1)/k\rho g = C(U_0 - U_1)$ , where  $C$  is a coefficient that can be

calibrated by injecting a known volume of gas into the gas gathering tube and recording the variation of output voltage of the differential pressure transducer.

### Preparation of SnTPPCOP

The novel tin porphyrin axially-coordinated 2D covalent organic polymer (SnTPPCOP) was prepared via a straightforward nucleophilic substitution (Scheme 1). In a typical synthetic route, SnTPP (0.02 mol) and TPP (0.01 mol) were added into a mixture of anhydrous tetrahydrofuran (50 mL) and pyridine (20 mL). And then the homogeneous solution was heated under flux for 5 days. The resultant solution was allowed to cool to room temperature and then was diluted with CH<sub>3</sub>OH. The precipitate was collected by filtration through a 0.45 μm nylon membrane. The obtained filter cake was washed with water, anhydrous tetrahydrofuran and CH<sub>3</sub>OH for several times to remove byproducts until the filtrate became colorless. Then, the powder was dried at room temperature under vacuum for 6 h to afford the desired SnTPPCOP.

### Kinetic analysis based on the dual-pathway kinetic model

We performed kinetic analyses to evaluate the standard activation free energies for the three elementary reaction steps of HER following the procedure of Wang et al.<sup>2,3</sup> and Hu et. al.<sup>4</sup> There are three elementary reaction steps for the alkaline HER on the catalysts' surfaces, including Volmer step ( $\text{H}_2\text{O} + \text{e}^- \rightarrow \text{H}_{\text{ad}} + \text{OH}^-$ ), Heyrovsky step ( $\text{H}_2\text{O} + \text{H}_{\text{ad}} + \text{e}^- \rightarrow \text{H}_2 + \text{OH}^-$ ) and Tafel step ( $2\text{H}_{\text{ad}} \rightarrow \text{H}_2$ ). Under steady-state conditions,  $d\theta/dt = v_{\text{T}} + v_{\text{H}} - v_{\text{V}} = 0$  ( $v_{\text{T}} + v_{\text{H}} = v_{\text{V}}$ ), where  $v$  is the reaction rate, and  $\theta$  is the surface coverage of the active reaction intermediate. The current is directly proportional to the sum of the reaction rates for the two single electron-transfer reactions ( $j_i = 2Fv_i$ ). Thus, the total kinetic currents ( $j_k$ ) can be expressed as below:

$$\begin{aligned}
 j_k &= F(v_{\text{V}} + v_{\text{H}}) = (j_{\text{V}} + j_{\text{H}})/2 \\
 &= 2F(v_{\text{T}} + v_{\text{H}}) = j_{\text{T}} + j_{\text{H}} \\
 &= 2F(v_{\text{V}} - v_{\text{T}}) = j_{\text{V}} - j_{\text{T}}
 \end{aligned} \tag{S1}$$

The kinetic currents for each individual step are:

$$j_T = j^* e^{-\Delta G_{+T}^{*0}/kT} [(1-\theta)^2 - e^{2\Delta G_{ad}^0/kT} \theta^2] \quad (S2)$$

$$j_H = j^* e^{-\Delta G_{+H}^{*0}/kT} [e^{0.5\eta/kT} (1-\theta) - e^{(\Delta G_{ad}^0 - 0.5\eta)/kT} \theta] \quad (S3)$$

$$j_V = j^* e^{-\Delta G_{-V}^{*0}/kT} [e^{(\Delta G_{ad}^0 + 0.5\eta)/kT} \theta - e^{-0.5\eta/kT} (1-\theta)] \quad (S4)$$

where  $\Delta G$  represents the free energies of Volmer step ( $\Delta G_{-V}^{*0}$ ), Heyrovsky step ( $\Delta G_{+H}^{*0}$ ), Tafel step ( $\Delta G_{+T}^{*0}$ ) and H\*adsorption ( $\Delta G_{ad}^0$ ).

The calculation of the adsorption isotherm ( $\theta$ ) is given as below:

$$\theta = \frac{-B - \sqrt{B^2 - 4AC}}{2A} \quad (S5)$$

$$A = 2T_p - 2T_m \quad (S6)$$

$$B = -4T_p - H_p - H_m - V_p - V_m \quad (S7)$$

$$C = 2T_p + H_p + V_m \quad (S8)$$

$$T_p = e^{-\Delta G_{+T}^{*0}/kT} \quad (S9)$$

$$T_m = e^{-(\Delta G_{+T}^{*0} + 2\Delta G_{ad}^0)/kT} \quad (S10)$$

$$H_p = e^{-(\Delta G_{+H}^{*0} - 0.5\eta)/kT} \quad (S11)$$

$$H_m = e^{-(\Delta G_{+H}^{*0} - \Delta G_{ad}^0 + 0.5\eta)/kT} \quad (S12)$$

$$V_p = e^{-(\Delta G_{-V}^{*0} - \Delta G_{ad}^0 - 0.5\eta)/kT} \quad (S13)$$

$$V_m = e^{-(\Delta G_{-V}^{*0} + 0.5\eta)/kT} \quad (S14)$$

The  $kT$  is 25.51 meV at 300 K. The kinetic current,  $j_k(\eta) = f(\Delta G_{-V}^{*0}, \Delta G_{+H}^{*0}, \Delta G_{+T}^{*0}, \Delta G_{ad}^0, j, \theta)$  can be determined by equations of S1-S4, in which the adsorption isotherm,  $\theta(\eta) = f(\Delta G_{-V}^{*0}, \Delta G_{+H}^{*0}, \Delta G_{+T}^{*0}, \Delta G_{ad}^0)$  can be obtained from equations of S5-S14.

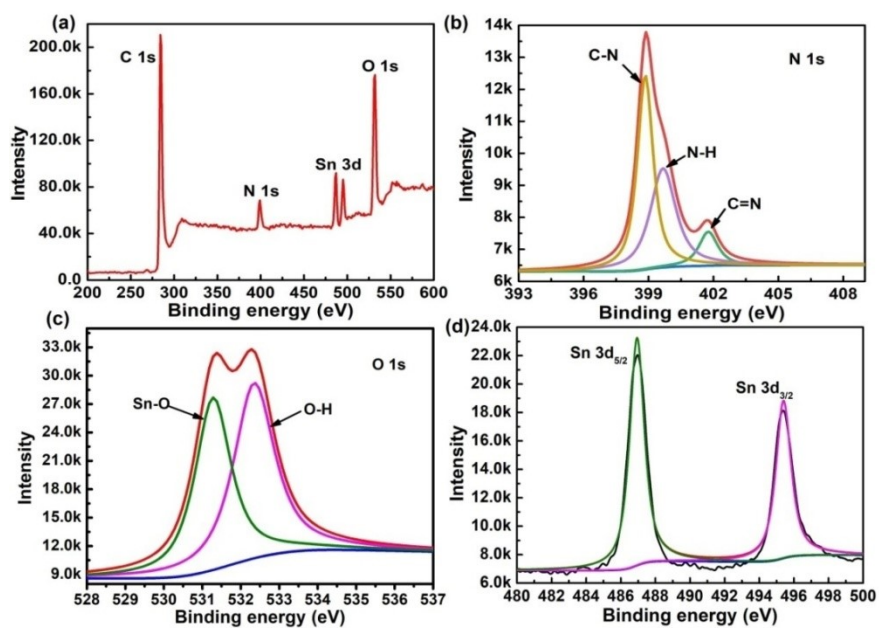

Figure S1. (a) XPS survey spectrum of SnTPPCOP; High-resolution XPS spectra of (b) N 1s, (c) O 1s and (d) Sn 3d.

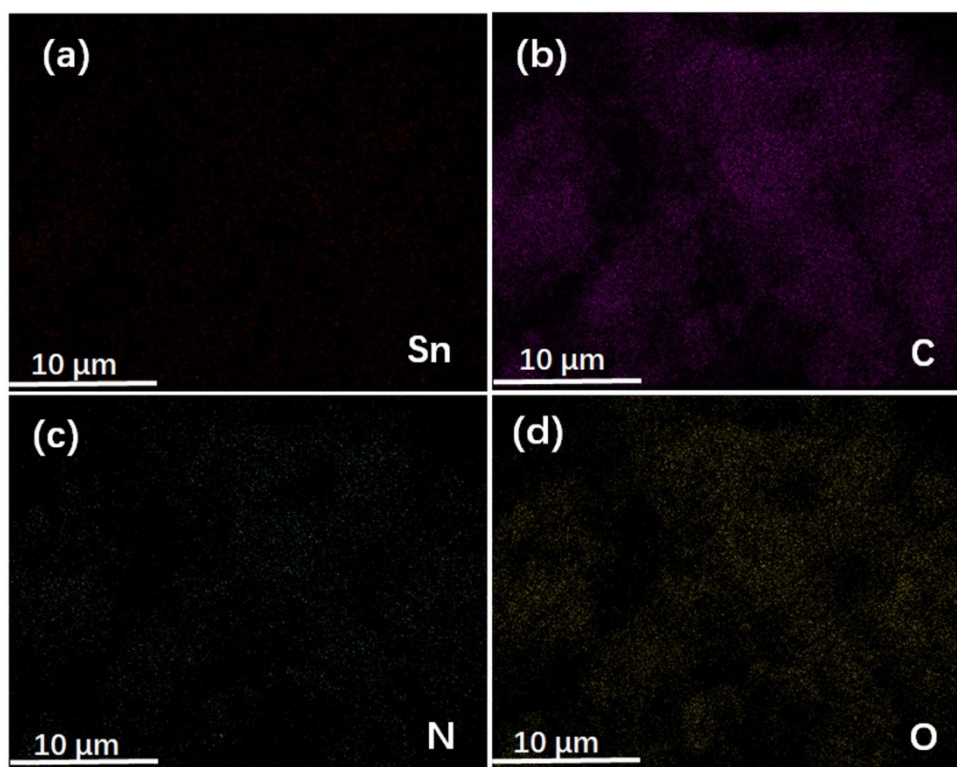

Figure S2. The merged elemental mapping images of SnTPPCOP.

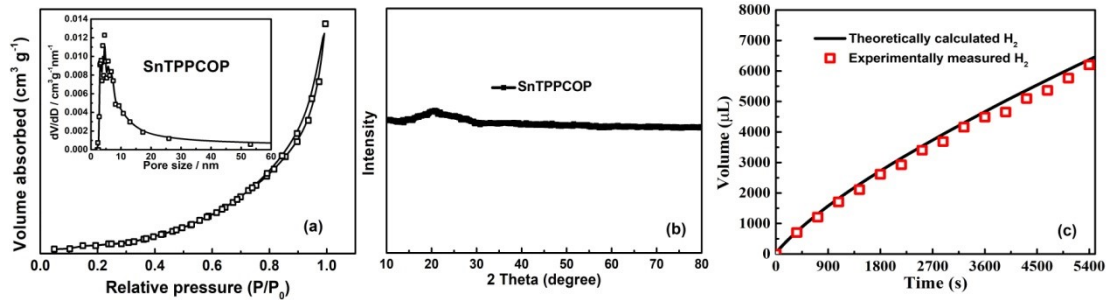

Figure S3. (a) The nitrogen adsorption-desorption isotherms (Insert is the pore width distribution curve), (b) XRD pattern and (c) the amount of H<sub>2</sub> experimentally measured and theoretically calculated as a function of time for SnTPPCOP.

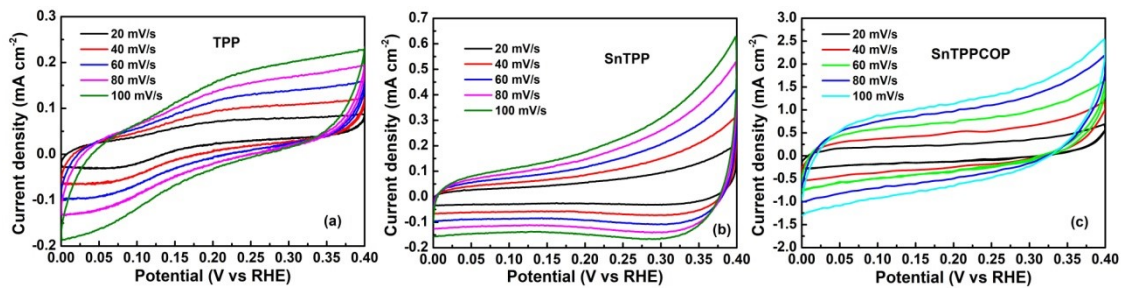

Figure S4. CV measurements with various scan rates for (a) TPP, (b) SnTPP and (c) SnTPPCOP.

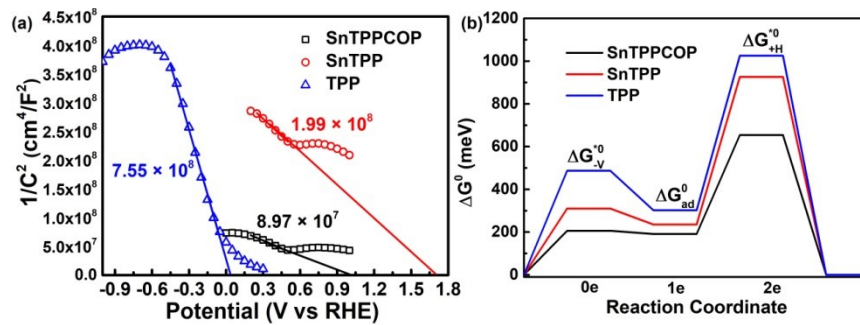

Figure S5. (a) Mott-Schottky plots and (b) free energy diagram of the as-prepared samples.

**Table S1.** Comparison of HER performance of SnTPPCOP with some other reported electrocatalysts.

| <b>Electrocatalysts</b>                          | <b>Overpotential (mV@10 mA cm<sup>-2</sup>)</b>         | <b>Ref.</b>      |
|--------------------------------------------------|---------------------------------------------------------|------------------|
| CoS <sub>2</sub> /CoSe@C                         | 164 (1.0 M KOH)                                         | 5                |
| Co <sub>0.9</sub> Ni <sub>0.1</sub> Se           | 186 (1.0 M KOH)                                         | 6                |
| CoSe@NCNT/NCN                                    | 197 (0.5 M H <sub>2</sub> SO <sub>4</sub> )             | 7                |
| NiSe <sub>2</sub> @N-doped carbon                | 162 (1.0 M KOH)                                         | 8                |
| NiSe <sub>2</sub> @NG                            | 201 (0.5 M H <sub>2</sub> SO <sub>4</sub> )             | 9                |
| Co <sub>9</sub> S <sub>8</sub> @MoS <sub>2</sub> | 239 (1.0 M KOH)                                         | 10               |
| FeMoP-0.10                                       | 195 (1.0 M KOH)                                         | 11               |
| MoP NTs/Mo                                       | 269 (1.0 M KOH)                                         | 12               |
| MoP@NCF                                          | 234.6 (0.5 M H <sub>2</sub> SO <sub>4</sub> )           | 13               |
| CoP(MoP)-CoMoO <sub>3</sub> @CN                  | 198 (1.0 M KOH)                                         | 14               |
| TiCP-PCP                                         | 339 (0.5 M H <sub>2</sub> SO <sub>4</sub> )             | 15               |
| SB-PORPy-COF                                     | 380 ( $\eta_5$ , 0.5 M H <sub>2</sub> SO <sub>4</sub> ) | 16               |
| CoTCPP polymer                                   | 475 (0.5 M H <sub>2</sub> SO <sub>4</sub> )             | 17               |
| CoO <sub>x</sub> -N-C/TiO <sub>2</sub> C(22.7%)  | 367.8 (1.0 M KOH)                                       | 18               |
| Cu-CMP700                                        | 350 (1.0 M KOH)                                         | 19               |
| CoP-nph-CMP-800                                  | 360 (1.0 M KOH)                                         | 20               |
| CoCOP                                            | 310 (1.0 M KOH)                                         | 21               |
| COF-Ni(OH) <sub>2</sub>                          | 258 (1.0 M KOH)                                         | 22               |
| Ru@COF-1                                         | 200 (0.5 M H <sub>2</sub> SO <sub>4</sub> )             | 23               |
| C6-TRZ-TFP COF                                   | 200 (0.5 M H <sub>2</sub> SO <sub>4</sub> )             | 24               |
| THTNi 2DSP                                       | 330 (0.5 M H <sub>2</sub> SO <sub>4</sub> )             | 25               |
| <b>SnTPPCOP</b>                                  | <b>147</b>                                              | <b>This work</b> |

## References

- [1] V.S. Shetti, M. Ravikanth, Sn(IV) porphyrin based axial-bonding type porphyrin triads containing heteroporphyrins as axial ligands, *Inorg. Chem.* 49 (2010) 2692-2700.
- [2] J.X. Wang, T.E. Springer, P. Liu, M. Shao, R.R. Adzic, Hydrogen oxidation reaction on Pt in acidic media: Adsorption isotherm and activation free energies. *J. Phys. Chem. C* 111 (2007) 12425-12433.
- [3] J.X. Wang, T.E. Springer, R.R. Adzic, Dual-pathway kinetic equation for the hydrogen oxidation reaction on Pt electrodes. *J. Electrochem. Soc.* 153 (2006) A1732.
- [4] J. Hu, C. Zhang, L. Jiang, H. Lin, Y. An, D. Zhou, M.K.H. Leung, S. Yang, Nanohybridization of MoS<sub>2</sub> with layered double hydroxides efficiently synergizes the hydrogen evolution in alkaline media. *Joule* 2017,1, 383-393.

- [5] K. Karuppasamy, R. Bose, V.R. Jothi, D. Vikraman, Y.T. Jeong, P. Arunkumar, D.B. Velusamy, T. Maiyalagan, A. Alfantazi, H.S. Kim, High performance, 3D-hierarchical  $\text{CoS}_2/\text{CoSe}@C$  nanohybrid as an efficient electrocatalyst for hydrogen evolution reaction, *J. Alloys Compd.* 838 (2020) 155537.
- [6] W.W. Zhong, Z.P. Wang, N. Gao, L.G. Huang, Z.P. Lin, Y.P. Liu, F.Q. Meng, J. Deng, S.F. Jin, Q.H. Zhang, L. Gu, Coupled vacancy pairs in Ni-doped CoSe for improved electrocatalytic hydrogen production through topochemical deintercalation, *Angew. Chem. Int. Ed.* 59 (2020) 22743-22748.
- [7] M. Yang, Y.Y. Yang, K.Z. Wang, S.W. Li, F. Feng, K. Lan, P.B. Jiang, X.K. Huang, H.L. Yang, R. Li, Facile synthesis of CoSe nanoparticles encapsulated in N-doped carbon nanotubes-grafted N-doped carbon nanosheets for water splitting, *Electrochimica Acta* 337 (2020) 135685.
- [8] Z.D. Huang, S. Yuan, T.T. Zhang, B. Cai, B. Xu, X.Q. Lu, L.L. Fan, F.N. Dai, D.F. Sun, Selective selenization of mixed-linker Ni-MOFs:  $\text{NiSe}_2@\text{NC}$  core-shell nanooctahedrons with tunable interfacial electronic structure for hydrogen evolution reaction, *Appl. Catal. B: Environ.* 272 (2020) 118976.
- [9] W.X. Li, B. Yu, Y. Hu, X.Q. Wang, D.X. Yang, Y.F. Chen, Core-shell structure of  $\text{NiSe}_2$  nanoparticles@nitrogen-doped graphene for hydrogen evolution reaction in both acidic and alkaline media, *ACS Sustainable Chem. Eng.* 7 (2019) 4351-4359.
- [10] L.H. He, S.J. Huang, Y.K. Liu, M.H. Wang, B.B. Cui, S.D. Wu, J.M. Liu, Z.H. Zhang, M. Du, Multicomponent  $\text{Co}_9\text{S}_8@\text{MoS}_2$  nanohybrids as a novel trifunctional electrocatalyst for efficient methanol electrooxidation and overall water splitting, *J. Colloid Interf. Sci.* 586 (2021) 538-550.
- [11] X. Liang, D. Z. Zhang, Z. Z. Wu, D. Z. Wang, The Fe-promoted MoP catalyst with high activity for water splitting, *Appl. Catal. A: Gen.* 524 (2016) 134-138.
- [12] H.N. Yu, S. Cao, B. Fu, Z. J. Wu, J. J. Liu, L. Y. Piao, Self-supported nanotubular MoP electrode for highly efficient hydrogen evolution via water splitting, *Catal. Commun.* 127 (2019) 1-4.
- [13] J. S. Li, J. Y. Li, X. R. Wang, S. Zhang, J. Q. Sha, G. D. Liu, Reduced graphene oxide-supported  $\text{MoP}@P$ -doped porous carbon nano-octahedrons as high-performance electrocatalysts for hydrogen evolution, *ACS Sustainable Chem. Eng.* 6 (2018) 10252-10259.
- [14] L. Yu, Y. Xiao, C. L. Luan, J. T. Yang, H. Y. Qiao, Y. Wang, X. Zhang, X. P. Dai, Y. Yang, H. H. Zhao, Cobalt/molybdenum phosphide and oxide heterostructures encapsulated in N-doped carbon nanocomposite for overall water splitting in alkaline media, *ACS Appl. Mater. Interfaces* 11 (2019) 6890-6899.
- [15] A.J. Wang, L.X. Cheng, X.L. Shen, W.H. Zhu, L.H. Li, Mechanistic insight on porphyrin based porous titanium coordination polymer as efficient bifunctional electrocatalyst for hydrogen and oxygen evolution reactions, *Dyes Pigments* 181 (2020) 108568.
- [16] S. Bhunia, S. K. Das, R. Jana, S. C. Peter, S. Bhattacharya, M. Addicoat, A. Bhaumik, A. Pradhan, Electrochemical stimuli-driven facile metal-free hydrogen evolution from pyrene-porphyrin-based crystalline covalent organic framework, *ACS Appl. Mater. Interfaces* 2017, 9, 23843-23851.
- [17] Y. Y. Wu, J. M. Veleta, D. Tang, A. D. Price, C. E. Botez, D. Villagran, Efficient



- electrocatalytic hydrogen gas evolution by a cobalt-porphyrin-based crystalline polymer, *Dalton Tans.* 2018, 47, 8801-8806.
- [18] L. H. He, J. M. Liu, B. Hu, Y. K. Liu, B. B. Cui, D. L. Peng, Z. H. Zhang, S. D. Wu, B. Z. Liu, Cobalt oxide doped with titanium dioxide and embedded with carbon nanotubes and graphene-like nanosheets for efficient trifunctional electrocatalyst of hydrogen evolution, oxygen reduction, and oxygen evolution reaction, *J. Power Sources* 2019, 414, 333-344.
- [19] S. S. Cui, M. M. Qian, X. Liu, Z. J. Sun, P. W. Du, A copper porphyrin-based conjugated mesoporous polymer-derived bifunctional electrocatalysts for hydrogen and oxygen evolution, *ChemSusChem* 2016, 8, 2365-2373.
- [20] H. X. Jia, Y. C. Yao, Y. Y. Gao, D. P. Lu, P. W. Du, Pyrolyzed cobalt porphyrin-based conjugated mesoporous polymers as bifunctional catalysts for hydrogen production and oxygen evolution in water, *Chem. Commun.* 2016, 52, 13483-13486.
- [21] A.J. Wang, L.X. Cheng, W. Zhao, X.L. Shen, W.H. Zhu, Electrochemical hydrogen and oxygen evolution reactions from a cobalt-porphyrin-based covalent organic polymer, *J. Colloidal Interf. Sci.* 2020, 579, 598-606.
- [22] D. Mullangi, V. Dhavale, S. Shalini, S. Nandi, S. Collins, T. Woo, S. Kurungot, R. Vaidhyanathan, Low-overpotential electrocatalytic water splitting with noble-metal-free nanoparticles supported in a  $sp^3$  N-rich flexible COF, *Adv. Energy Mater.* 2016, 1600110.
- [23] Y.X. Zhao, Y. Liang, D.X. Wu, H. Tian, T. Xia, W.X. Wang, W.Y. Xie, X.M. Hu, X.L. Tian, Q. Chen, Ruthenium complex of  $sp^2$  carbon-conjugated covalent organic frameworks as an efficient electrocatalyst for hydrogen evolution, *Small* 2022, 2107750.
- [24] S. Ruidas, B. Mohanty, P. Bhanja, E.S. Erakulan, R. Thapa, P. Das, A. Chowdhury, S.K. Mandal, B.K. Jena, A. Bhaumik, Metal-free triazine-based 2D covalent organic framework for efficient  $H_2$  evolution by electrochemical water splitting, *ChemSusChem* 2021, 14, 5057-5064.
- [25] X.L. Feng, M. Pfeiffermann, H.W. Liang, Z.K. Zheng, X. Zhu, J. Zhang, X.L. Feng, Large-area, free-standing, two-dimensional supramolecular polymer single-layer sheets for highly efficient electrocatalytic hydrogen evolution, *Angew. Chem. Int. Ed.* 2015, 54, 12058-12063.
